# Supplementary material
Source: publisher figshare collection journal article supplement (https://frontiersin.figshare.com/ndownloader/files/12276602)
Supplement: Supplementary file [file 12276602]

**Supplementary Figure 2. Unsupervised hierarchical clustering of microRNAs in UPIA patients based on their differentiation during the follow-up.**

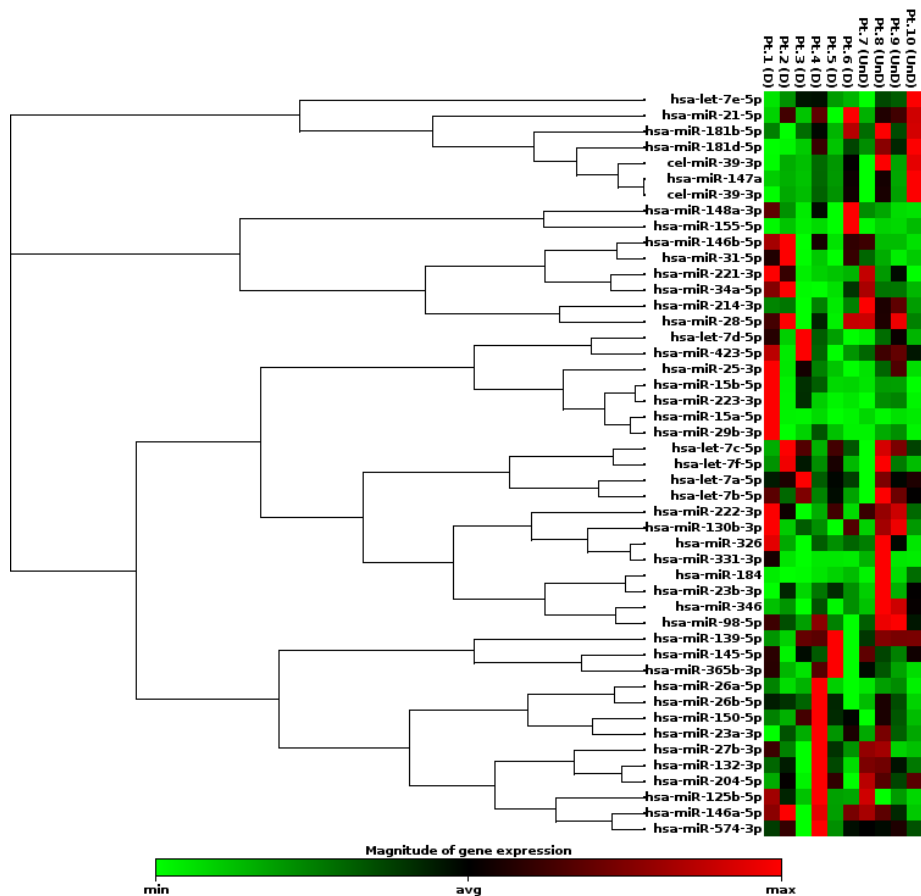

**Supplementary Figure 2 legend:** Unsupervised hierarchical clustering generated using fold change expression values of microRNAs analysed in UPIA patients who reached a definite diagnosis during the follow-up (D) versus UPIA patients who remained as UPIA (UnD); Color scheme: green: decreased expression; Red: Increased expression; Black: Unchanged.
